# Supplementary material for: Sox9 sustains chondrocyte survival and hypertrophy in part through Pik3ca-Akt pathways
Source: Oxford University Press journal article supplement (doi:10.1242/dev.057802), 2011-03-03
Supplement: dev057802tables2.pdf [file dev057802tables2.pdf]

**Table S2. siRNAs**

| siRNA  | Invitrogen Cat. No. | Target sequence (5' to 3') |
|--------|---------------------|----------------------------|
| SOX9-a | SOX9-HSS186044      | CAGCACUGGGAACAACCCGUCUACA  |
| SOX9-b | SOX9-HSS110099      | UGAAGAAGGAGAGCGAGGAGGACAA  |
| SOX9-c | SOX9-HSS110100      | GCAAGCUCUGGAGACUUCUGAACGA  |
